# Supplementary material for: TGFβ Signaling Intersects with CD103 Integrin Signaling to Promote T-Lymphocyte Accumulation and Antitumor Activity in the Lung Tumor Microenvironment
Source: Oxford University Press journal article supplement (doi:10.1158/0008-5472.can-15-1545), 2016-02-26
Supplement: 00085472can151545-sup-150783_2_supp_3276414_nzkb2m.doc [file 00085472can151545-sup-150783_2_supp_3276414_nzkb2m.doc]

**Supplementary figure legends**

**Supplementary Figure 1**

Effects of chemokines and TGF- on T-cell adhesion to recombinant molecules and specific tumor cells. **A.** CD103+/LFA-1+ T-cell clone adhesion is increased following stimulation with rCCL5 or rCCL20. Adhesion of the TIL clone, untreated or pretreated with rCCL5 (100 nM) or rCCL20 (200 nM) for 30 min, to rE-cadh-Fc or rICAM-1-Fc. *Right panel*: Mean numbers of adherent T cells per field. Statistical analyses are from 3 independent experiments (see also Supplementary Table II). Bars, 50 µm. **B.** Adhesion of CD103+/LFA-1+ and CD103-/LFA-1+ clones to autologous tumor cells under shear stress. T-cell clones, untreated or pretreated with rTGF- for indicated time points, were stained by CellTracker Green and incubated for 15 min on a monolayer of IGR-Heu or IGR-Heu-ICAM-1 tumor cells pre-cultured for 48 h in IBIDI chambers (µ-Slide VI 0.4 hydrophobic ibiTreat, IBIDI Biovalley). Adhesion was then recorded for 12 min at 2 s intervals under incrementing shear stress conditions (indicated by arrows and corresponding to 0.03, 0.06, 0.14 and 0.3 dyn/cm², respectively). Adherent cells were counted using an Image J program and values were normalized to the number of initial adherent cells, which was set at 100%. Data are from one experiment out of 3.

**Supplementary Figure 2**

Influence of TGF- and chemokines on integrin expression and T-cell motility. **A.** Effect of TGF- on CD103 and LFA-1 integrin expression. CD103+/LFA-1+ T cells were treated with rTGF- at indicated time points and then surface expression of each integrin was analyzed by indirect immunofluorescence using anti-CD103, anti-LFA-1 (color-filled) or an isotypic control (gray-filled). Results correspond to CD103 and LFA-1 mean fluorescence intensities (MFI). **B.** Filopodia formation is increased following CD103+/LFA-1+ T-cell clone stimulation with rCCL5 or rCCL20. Migratory behavior of CD103+/LFA-1+ T cells, untreated or pretreated with rCCL5 or rCCL20, seeded on rE-cadh-Fc or rICAM-1-Fc. Polymerized F-actin was visualized with rhodamine phalloidin. Arrows indicate filopodia and/or cell protrusions. The T-cell shape index is shown in right panel. Statistical analyses are from 3 independent experiments (see also Supplementary Table III). Bars, 5 µm; *p < 0.01.

**C.** Effects of TGF- on CD103+/LFA-1+ T-cell motility. T cells, untreated or pretreated for 96 h with rTGF-, were stained with CellTracker Green and then incubated for 5 min on rE-cadh-Fc or rICAM-1-Fc-coated IBIDI chambers. Motility was then recorded for 90 min at 10 s intervals. Motility coefficient and length of cell displacement (represented by colored track) were defined using IMARIS software. *Right panel:* motility coefficient of T cells. Values are mean of 250 cells for each condition from 2 independent experiments. Bars, 20 µm.

**Supplementary Figure 3**

Tumor slice staining, influence of anti-CD103 on calcium response and ILK phosphorylation and effect of TGF- and chemical inhibitors on ILK expression and T-cell adhesion.

**A.** Identification of epithelial tumor islets within lung tumor slices. IGR-Heu and IGR-Heu-ICAM-1 tumor slices were fixed and then stained with anti-E-cadherin-FITC mAb (green). Brightness contrast images were used to distinguish tumor (T) from stroma (S) regions, which were characterized by dark and bright areas, respectively (right). Images were acquired with a ×4 objective. Bars, 150 µm. **B.** Calcium response of CD103+/LFA-1+ T cells plated on E-cadherin+/ICAM-1- tumor cells. T cells, pretreated with rTGF- for 24 h and then preincubated in medium or in the presence of neutralizing anti-CD103 mAb for 20 min, were loaded with Fura-2 probe (red) and then plated on a monolayer of E-cadherin+/ICAM-1- (IGR-Heu) tumor cells. Calcium response is represented in pseudo-colors from green (average calcium level) to red (strong calcium level). *Right panel*: Quantification of intracellular Ca2+ was performed by a MetaFluor Analyst Software. ***p < 0.0001. Bars, 80 µm. **C.** TGF- upregulates *ILK* gene expression. *ILK* mRNA expression levels in CD103+/LFA-1+ T cells, untreated or pretreated for indicated time points with rTGF-, were quantified by quantitative RT-PCR using FH1-ILK (5’-TCAAACAGCTTAACTTCCTG) and RH1-ILK (5’-ATTTGGATGCGAGAAAATCC) primer pairs. **D**. Neutralizing anti-CD103 mAb inhibit ILK phosphorylation induced by engagement of the integrin with rE-cadh-Fc.CD103+/LFA-1+ T cells were untreated or pretreated with anti-CD103 mAb and then stimulated for 1 h with immobilized rE-cadh-Fc. T-cell protein extracts were analyzed by western blot using anti-phospho-ILK, anti-ILK or anti-F-actin mAb. *Right panel:* normalization of phospho-ILK relative to ILK. **E.** QLT and SB inhibit T-cell adhesion to rE-cadh-Fc in a dose-dependent manner.Adhesion of CD103+/LFA-1+ T cells, untreated or pretreated with QLT or SB inhibitors at indicated concentrations, to immobilized rE-cadh-Fc was analyzed by confocal microscopy.*Right panel:* statistical analyses are from 3 independent experiments. Bars, 35 µm; *p < 0.01, **p < 0.001 and ***p < 0.0001.

**Supplementary Figure 4**

Influence of siRNA-E-cadherin, shRNA-ILK and rTGF- on CD103, phospho-ILK and TGFBRI polarization. **A.** Relocalization of phospho-ILK at the IS is dependent on the CD103-E-cadherin interaction. Polarization of phospho-ILK (blue) and CD103 (red) at the IS between CD103+/LFA-1+ CTL and IGR-Heu tumor cells, untreated or pretreated with siRNA targeting E-cadherin (siRNA-E1 and siRNA-E2) or siRNA-luc control, was analyzed by confocal microcospy. *Right panel*: percentages of T cells displaying polarized phospho-ILK (n=40). Statistical analyses are from one experiment out of 3. Bars, 10 m. **B**. shRNA targeting ILK reduce expression of ILK. Two ILK-specific target sequences were used, ILK1: 5’-CGCACTCAATAGCCGTAGTGTA-3’ and ILK2: 5’-CGAAGCTCAACGAGAATCA-3’. Double-stranded DNA containing the interference sequences was synthesized and then inserted intothe linearized pRRLSIN.cPPT.PGK-GFP.WPRE viral vector. The empty pRRL vector was used as a negative control. Protein extracts from CD103+/LFA-1+ T cells, infected with empty-lentivirus (Lv), shILK1-Lv or shILK2-Lv and selected based on GFP expression, were analyzed by western blot using anti-ILK or anti-F-actin mAb. Lower panel: normalization of ILK relative to F-actin. **C.** Silencing of ILK with specific shRNA blocks relocalization of CD103 at the IS. Conjugates between CD103+/LFA-1+ CTL, untransducted or transduced with shILK1-Lv, shILK2-Lv or empty-Lv, and IGR-Heu tumor cells were analyzed for GFP expression (green) and CD103 (red) localization. *Right panel*: percentages of T cells displaying polarized CD103 (n=25). Statistical analyses are from one experiment out of 3. Bars, 10 m. **D.** Conjugates between CD103+/LFA-1+ CTL, untreated or pretreated with rTGF-for 24 h or 96 h, and autologous tumor cells were analyzed for CD103, phospho-ILK and TGFBRI (green) polarization. *Right panel*: percentages of T cells displaying polarized proteins (n=35). Statistical analyses are from one experiment out of 3. Bars, 10 µm; *p < 0.01, **p < 0.001 and ***p < 0.0001.

**Supplementary Figure 5**

Effects of TGF- and chemical inhibitors on granzyme B polarization or redirected target cell lysis. **A.** Polarization of granzyme B (GrzB, green) at the contact area between CD103+/LFA-1+ CTL and rE-cadh-Fc-coated beads (*left*) or rICAM-1-Fc-coated beads (*right)*. Right panels: Statistical analyses are from 2 independent experiments. Bars, 2.5 µm. **B.** Redirected cytotoxic activity of the CD103+/LFA-1+ CTL clone toward the FcR-positive P815 murine target. 51Cr-labeled P815 target cells were preincubated for 1 h with anti-CD3 (OKT3) mAb, and then CD103+/LFA-1+ CTL, untreated or pretreated with indicated inhibitors, were added. Cytotoxicity was determined by a conventional 4-h 51Cr release assay at indicated E:T ratios.

**Movies**

T-cell migratory behavior. Fluorescent-labeled T cells (green), untreated (A and B) or pretreated with rTGF- (C and D), were seeded on rE-cadh-Fc or rICAM-1-Fc-coated slices and then images were acquired for a period of 1 h 30. Frame intervals: 10 min. Movies were made with the ImageJ software.
