# Supplementary material for: TGFβ Signaling Intersects with CD103 Integrin Signaling to Promote T-Lymphocyte Accumulation and Antitumor Activity in the Lung Tumor Microenvironment
Source: Oxford University Press journal article supplement (doi:10.1158/0008-5472.can-15-1545), 2016-02-26
Supplement: 00085472can151545-sup-150783_2_supp_3276451_nzk9mx.docx [file 00085472can151545-sup-150783_2_supp_3276451_nzk9mx.docx]

**Supplementary Table I:** Statistical analyses of results shown in Figure 1A

| **rE-cadherin-Fc** | Medium | rCXCL12 | rTGF-β  (30 min) | rTGF-β  (6 h) | rTGF-β  (24 h) | rTGF-β  (96 h) |
| --- | --- | --- | --- | --- | --- | --- |
| Experiment 1 | 126 | 164 | 139 | 152 | 278 | 308 |
| Experiment 2 | 96 | 172 | 89 | 114 | 237 | 358 |
| Experiment 3 | 86 | 223 | 101 | 150 | 297 | 322 |
| Average of the three experiments | 103 | 186 | 110 | 139 | 270 | 330 |
| Standard deviation | 21 | 32 | 26 | 21 | 31 | 26 |

| **rICAM-1-Fc** | Medium | rCXCL12 | rTGF-β  (30 min) | rTGF-β  (6 h) | rTGF-β  (24 h) | rTGF-β  (96 h) |
| --- | --- | --- | --- | --- | --- | --- |
| Experiment 1 | 150 | 225 | 168 | 178 | 135 | 86 |
| Experiment 2 | 132 | 188 | 135 | 140 | 101 | 45 |
| Experiment 3 | 174 | 259 | 176 | 168 | 89 | 49 |
| Average of the three experiments | 152 | 224 | 160 | 162 | 108 | 60 |
| Standard deviation | 21 | 36 | 22 | 20 | 24 | 23 |

| **rFibronectin-Fc** | Medium |
| --- | --- |
| Experiment 1 | 70 |
| Experiment 2 | 36 |
| Experiment 3 | 48 |
| Average of the three experiments | 51 |
| Standard deviation | 18 |

Values correspond to the mean number of adherent T cells per field. p values were calculated using unpaired *t-test*

**Supplementary Table II:** Statistical analyses of results shown

in Supplementary Figure 1A

| **rE-cadherin-Fc** | Medium | rCCL5 | rCCL20 |
| --- | --- | --- | --- |
| Experiment 1 | 90 | 175 | 185 |
| Experiment 2 | 105 | 153 | 143 |
| Experiment 3 | 73 | 145 | 177 |
| Average of the three experiments | 89 | 158 | 168 |
| Standard deviation | 16 | 16 | 23 |

| **rICAM-1-Fc** | Medium | rCCL5 | rCCL20 |
| --- | --- | --- | --- |
| Experiment 1 | 159 | 172 | 155 |
| Experiment 2 | 133 | 215 | 202 |
| Experiment 3 | 124 | 169 | 172 |
| Average of the three experiments | 139 | 185 | 177 |
| Standard deviation | 17 | 25 | 24 |

Values correspond to the mean number of adherent T cells per field.

p values were calculated using unpaired *t-test.*

**Supplementary Table III:** Statistical analyses of results shown

in Supplementary Figure 2B.

| **rE-cadherin-Fc** | Medium | rCCL5 | rCCL20 |
| --- | --- | --- | --- |
| Experiment 1 | 2.4 | 3.5 | 2.8 |
| Experiment 2 | 1.7 | 2.7 | 2.5 |
| Experiment 3 | 1.7 | 2.7 | 3.4 |
| Average of the three experiments | 1.9 | 2.9 | 2.8 |
| Standard deviation | 0.4 | 0.4 | 0.5 |

| **rICAM-1-Fc** | Medium | rCCL5 | rCCL20 |
| --- | --- | --- | --- |
| Experiment 1 | 2.4 | 3.3 | 3.4 |
| Experiment 2 | 2.6 | 3 | 2.9 |
| Experiment 3 | 1.9 | 2.6 | 2.6 |
| Average of the three experiments | 2.3 | 3.0 | 3.0 |
| Standard deviation | 0.3 | 0.4 | 0.4 |

Values correspond to the mean of T-cell shape index.

p values were calculated using unpaired *t-test.*
